# Supplementary material for: Opposing roles of microRNA Argonautes during Caenorhabditis elegans aging
Source: PLOS journal article supplement (doi:10.1371/journal.pgen.1007379), 2018-06-21

**S1 Fig. Functionality of engineered *alg-1* and *alg-2* alleles.** Percent of embryos that developed into viable larvae at 20°C for the indicated strains and conditions.

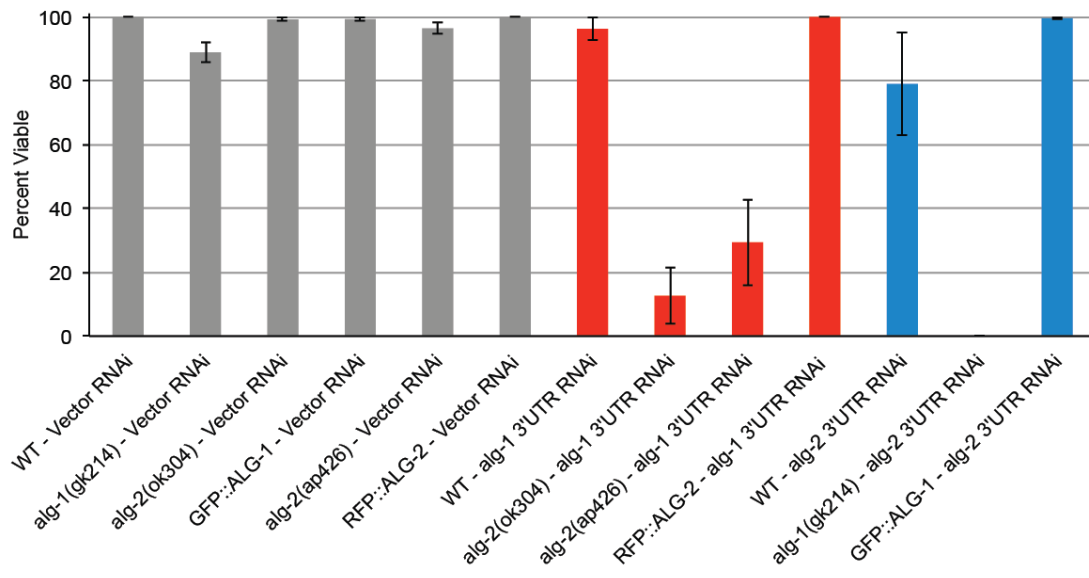

Supplement: S6 (10.1371/journal.pgen.1007379.s006) [file journal.pgen.1007379.s006]
